# Supplementary material for: Production of stable aqueous dispersion of poly(3,4-ethylenedioxythiophene) nanorods using graphene oxide as a stabilizing agent and their application for nitrite detection
Source: Royal Society of Chemistry journal article supplement (doi:10.1039/c1an15799j), 2011-01-01
Supplement: c1an15799j.pdf [file c1an15799j.pdf]

## Electronic Supplementary Information

Production of stable aqueous dispersion of poly(3,4-ethylenedioxythiophene) nanorods using graphene oxide as a stabilizing agent and their application for nitrite detection

Sen Liu,<sup>a</sup> Jingqi Tian,<sup>a,b</sup> Lei Wang,<sup>a</sup> Yonglan Luo,<sup>a</sup> and Xuping Sun\*<sup>a</sup>

<sup>a</sup> State Key Lab of Electroanalytical Chemistry, Changchun Institute of Applied Chemistry, Chinese Academy of Sciences, Changchun 130022, Jilin, China

<sup>b</sup> Graduate School of the Chinese Academy of Sciences, Beijing 100039, China

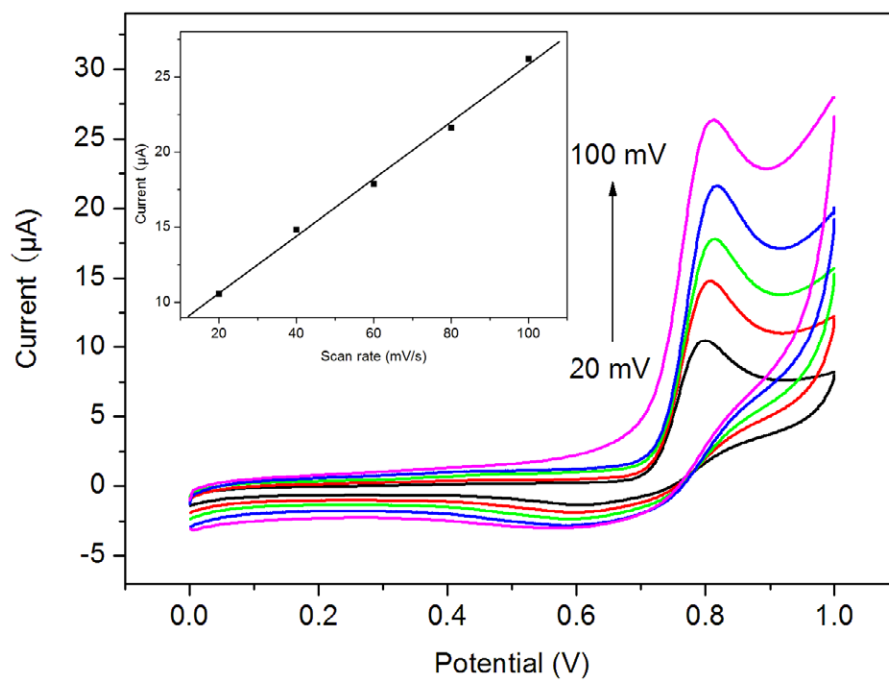

**Fig. S1** CVs of PEODT-GO/AuE at a scanning rate of 20, 40, 60, 80 and 100 mV/s in 0.1 M PBS (pH 6.8, with 1 mM NaNO<sub>2</sub>). Inset: plot of the scan rate vs. peak current.

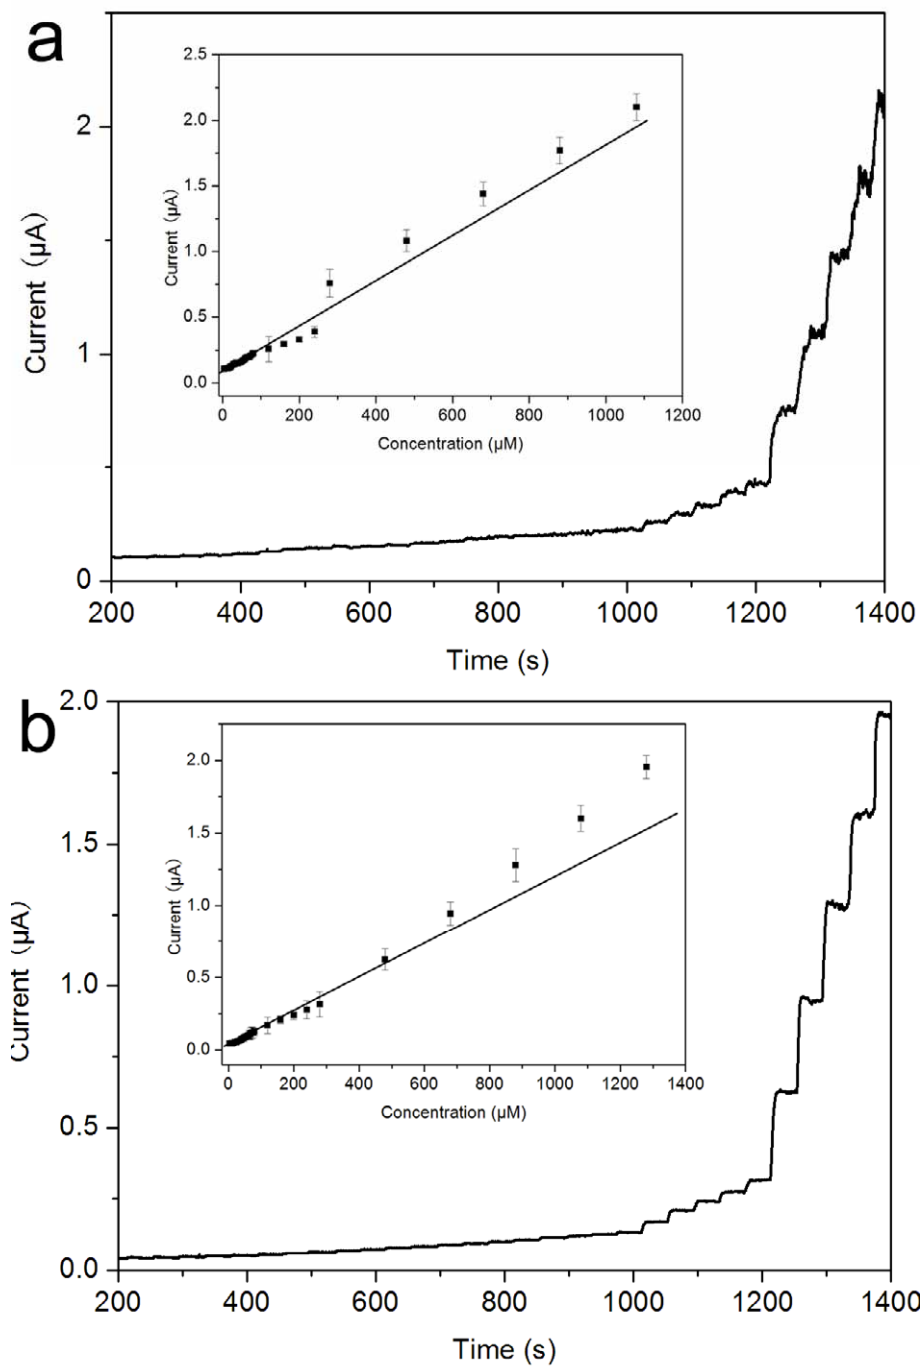

**Fig. S2** Typical steady-state response of the PEDOT/AuE (a) and GO/AuE (b) to successive injection of  $\text{NaNO}_2$  into the stirred 0.2 M PBS at pH: 6.5. Inset: the corresponding calibration curve with error bars (Applied potential: 0.8 V).
